# Supplementary material
Source: publisher figshare collection journal article supplement (https://sage.figshare.com/ndownloader/files/17797541)
Supplement: Supplementary file 1 [file 17797541]

**Supplemental Table 1:** ICD-9 and ICD-10 codes used to identify potential cases of splenic rupture (Left column) and mononucleosis (Right Column)

| Splenic Injury Codes |                                                                                          | Mononucleosis Codes |                                                        |
|----------------------|------------------------------------------------------------------------------------------|---------------------|--------------------------------------------------------|
| ICD Code             | Name                                                                                     | ICD Code            | Name                                                   |
| 28950                | Disease Of Spleen, Unspecified                                                           | 0340                | Streptococcal Sore Throat                              |
| 28959                | Disease Of Spleen Unspecified                                                            | 0579                | Viral Exanthem, Unspecified                            |
| 78940                | Abdominal Rigidity, Unspecified Site                                                     | 075                 | Infectious Mononucleosis                               |
| 78942                | Abdominal Rigidity, Left Upper Quadrant                                                  | 0785                | Cytomegaloviral Disease                                |
|                      |                                                                                          |                     | Unspecified Viral Infection In Conditions Classified   |
| 78947                | Abdominal Rigidity, Generalized                                                          | 07999               | Elsewhere And Of Unspecified Site                      |
| 78962                | Abdominal Tenderness To Palpation, Left Upper Quadrant                                   | 2893                | Lymphadenitis, Unspecified, Except Mesenteric          |
| 79001                | Precipitous Drop In Hematocrit                                                           | 460                 | Acute Nasopharyngitis [Common Cold]                    |
| 86500                | Unspecified Injury To Spleen Without Mention Of Open Wound                               | 4610                | Acute Maxillary Sinusitis                              |
| 86501                | Hematoma Of Spleen Without Mention Of Open Wound Into Cavity                             | 4618                | Other Acute Sinusitis                                  |
| 86502                | Capsular Tear Of Spleen Without Mention Of Open Wound Into Cavity                        | 4619                | Acute Sinusitis, Unspecified                           |
| 86503                | Laceration Of Spleen Without Mention Of Open Wound Into Cavity                           | 462                 | Acute Pharyngitis                                      |
| 86504                | Massive Parenchymal Disruption Of Spleen Without Mention Of Open Wound Into Cavity       | 46400               | Acute Laryngitis, Without Mention Of Obstruction       |
| 86509                | Other Injury Of Spleen, Initial Encounter                                                | 46401               | Acute Laryngitis, With Obstruction                     |
| 86510                | Unspecified Injury To Spleen With Open Wound Into Cavity                                 | 46420               | Acute Laryngotracheitis Without Mention Of Obstruction |
| 86511                | Hematoma Of Spleen, Without Rupture Of Capsule, With Open Wound Into Cavity              | 46421               | Acute Laryngotracheitis With Obstruction               |
| 86512                | Capsular Tears To Spleen, Without Major Disruption Of Parenchyma, Open Wound Into Cavity | 4650                | Acute Laryngopharyngitis                               |
| 86513                | Laceration Of Spleen Extending to Parenchyma, Open Wound Into Cavity                     | 4650                | Acute Laryngopharyngitis                               |

|         |                                                                                   |       |                                                            |
|---------|-----------------------------------------------------------------------------------|-------|------------------------------------------------------------|
| 86514   | Massive Parenchymal Disruption Of Spleen, Open Wound Into Cavity                  | 4658  | Acute Upper Respiratory Infections Of Other Multiple Sites |
| 86519   | Other Injury To Spleen With Open Wound Into Cavity                                | 4659  | Acute Upper Respiratory Infections Of Unspecified Site     |
| D735    | Disease Of Spleen, Unspecified                                                    | 47829 | Other Diseases Of Pharynx, Not Elsewhere Classified        |
| D7389   | Other Disease Of Spleen                                                           | 4785  | Other Diseases Of Vocal Cords                              |
| D7801   | Intraoperative Hemorrhage Of Spleen                                               | 47879 | Other Diseases Of Larynx, Not Elsewhere Classified         |
| D7802   | Intraoperative Hemorrhage And Hematoma Of The Spleen Complicating Other Procedure | 4789  | Other And Unspecified Diseases Of Upper Respiratory Tract  |
| D7881   | Other Intraoperative Complication Of Spleen                                       | 4808  | Pneumonia Due To Other Virus Not Elsewhere Classified      |
| D7889   | Other Post Procedural Complication Of Spleen                                      | 4809  | Viral Pneumonia, Unspecified                               |
| R161    | Splenomegaly                                                                      | 51919 | Other Diseases Of Trachea And Bronchus                     |
| S35321a | Laceration Of Splenic Vein, Initial Encounter                                     | 683   | Acute Lymphadenitis                                        |
| S35321d | Laceration Of Splenic Vein, Subsequent Encounter                                  | 78079 | Other Malaise And Fatigue                                  |
| S35321s | Laceration Of Splenic Vein, Sequelae                                              | 7821  | Rash And Other Nonspecific Skin Eruption                   |
| S35328a | Other Injury To Splenic Vein, Initial Encounter                                   | 7841  | Throat Pain                                                |
| S35328d | Other Injury To Splenic Vein, Subsequent Encounter                                | 78499 | Other Symptoms Involving Head And Neck                     |
| S35328s | Other Injury To Splenic Vein, Sequelae                                            | 7856  | Enlargement Of Lymph Nodes                                 |
| S35329a | Unspecified Injury To Splenic Vein, Initial Encounter                             | 7908  | Viremia, Unspecified                                       |
| S35329d | Unspecified Injury To Splenic Vein, Subsequent Encounter                          | B2700 | Gammaherpesviral Mononucleosis Without Complication        |
| S35329s | Unspecified Injury To Splenic Vein, Sequelae                                      | B2701 | Gammaherpesviral Mononucleosis With Polyneuropathy         |
| S3600xa | Unspecified Injury To Spleen, Initial Encounter                                   | B2702 | Gammaherpesviral Mononucleosis With Meningitis             |
| S3600xd | Unspecified Injury To Spleen, Subsequent Encounter                                | B2709 | Gammaherpesviral Mononucleosis With Other Complications    |
| S3600xs | Unspecified Injury To Spleen, Sequelae                                            | B2710 | Cytomegaloviral Mononucleosis Without Complications        |
| S36020a | Minor Contusion Of Spleen, Initial Encounter                                      | B2711 | Cytomegaloviral Mononucleosis With Polyneuropathy          |
| S36020d | Minor Contusion Of Spleen, Subsequent Encounter                                   | B2712 | Cytomegaloviral Mononucleosis With Meningitis              |

|         |                                                        |       |                                                               |
|---------|--------------------------------------------------------|-------|---------------------------------------------------------------|
| S36020s | Minor Contusion Of Spleen, Sequelae                    | B2719 | Cytomegaloviral Mononucleosis With Other Complication         |
| S36021a | Major Contusion Of Spleen, Initial Encounter           | B2780 | Other Infectious Mononucleosis Without Complication           |
| S36021d | Major Contusion Of Spleen, Subsequent Encounter        | B2781 | Other Infectious Mononucleosis With Polyneuropathy            |
| S36021s | Major Contusion Of Spleen, Sequelae                    | B2782 | Other Infectious Mononucleosis With Meningitis                |
| S36029a | Unspecified Contusion Of Spleen, Initial Encounter     | B2789 | Other Infectious Mononucleosis With Other Complication        |
| S36029d | Unspecified Contusion Of Spleen, Subsequent Encounter  | B2790 | Infectious Mononucleosis, Unspecified Without Complication    |
| S36029s | Unspecified Contusion Of Spleen, Sequelae              | B2791 | Infectious Mononucleosis, Unspecified With Polyneuropathy     |
| S36030a | Superficial Laceration Of Spleen, Initial Encounter    | B2792 | Infectious Mononucleosis, Unspecified With Meningitis         |
| S36030d | Superficial Laceration Of Spleen, Subsequent Encounter | B2799 | Infectious Mononucleosis, Unspecified With Other Complication |
| S36030s | Superficial Laceration Of Spleen, Sequelae             | B302  | Viral Pharyngoconjunctivitis                                  |
| S36031a | Moderate Laceration Of Spleen, Initial Encounter       | B338  | Other Specified Viral Diseases                                |
| S36031d | Moderate Laceration Of Spleen, Subsequent Encounter    | B348  | Other Viral Infections Of Unspecified Site                    |
| S36031s | Moderate Laceration Of Spleen, Sequelae                | B349  | Viral Infection, Unspecified                                  |
| S36032a | Major Laceration Of Spleen, Initial Encounter          | G933  | Postviral Fatigue Syndrome                                    |
| S36032d | Major Laceration Of Spleen, Subsequent Encounter       | J020  | Streptococcal Pharyngitis                                     |
| S36032s | Major Laceration Of Spleen, Sequelae                   | J028  | Acute Pharyngitis Due To Other Specified Organisms            |
| S36039a | Unspecified Laceration Of Spleen, Initial Encounter    | J029  | Acute Pharyngitis, Unspecified                                |
| S36039d | Unspecified Laceration Of Spleen, Subsequent Encounter | J0300 | Acute Streptococcal Tonsillitis, Unspecified                  |
| S36039s | Unspecified Laceration Of Spleen, Sequelae             | J0380 | Acute Tonsillitis Due To Other Specified Organisms            |
| S3609xa | Other Injury Of Spleen, Initial Encounter              | J0381 | Acute Recurrent Tonsillitis Due To Other Specified Organisms  |
| S3609xd | Other Injury Of Spleen, Subsequent Encounter           | J0390 | Acute Tonsillitis, Unspecified                                |
| S3609xs | Other Injury Of Spleen, Sequelae                       | J060  | Acute Laryngopharyngitis                                      |
|         |                                                        | J069  | Acute Upper Respiratory Infection, Unspecified                |
|         |                                                        | J1289 | Other Viral Pneumonia                                         |
|         |                                                        | R070  | Pain In Throat                                                |

|        |                                                                            |
|--------|----------------------------------------------------------------------------|
| R21    | Rash And Other Nonspecific Skin Eruption                                   |
| R5081  | Fever Presenting With Conditions Classified Elsewhere                      |
| R509   | Fever, Unspecified                                                         |
| R590   | Localized Enlarged Lymph Nodes                                             |
| R591   | Generalized Enlarged Lymph Nodes                                           |
| R599   | Enlarged Lymph Nodes, Unspecified                                          |
| V0179  | Contact Or Exposure To Other Viral Diseases                                |
| V7389  | Special Screening Examination For Other Specified Viral Diseases           |
| V7399  | Special Screening Examination For Unspecified Viral Disease                |
| V759   | Special Screening Examination For Unspecified Infectious Disease           |
| Z1159  | Encounter For Screening For Other Viral Diseases                           |
| Z20828 | Contact With And (Suspected) Exposure To Other Viral Communicable Diseases |
